# Supplementary material
Source: MDPI journal article supplement (https://www.mdpi.com/2072-4292/13/12/2400)
Supplement: s1 [file s1]

## Supplementary Information

**Table S1.** Main methods of evaluating and mapping human pressures

| Method                        | Proposer               | Time | Description                                                                                                                                                                                                                                                                                   | Resolution |
|-------------------------------|------------------------|------|-----------------------------------------------------------------------------------------------------------------------------------------------------------------------------------------------------------------------------------------------------------------------------------------------|------------|
| Wild land                     | McCloskey and Spalding | 1989 | Mapping the global wilderness (no human pressure areas) using a global navigation chart that included airports, roads, railways, settlements, buildings, major mines and dams.                                                                                                                | -          |
| Human Footprint               | Sanderson et al        | 2002 | Evaluating and mapping the pressure of human activities by re-assignment and overlaying of four categories of spatial data, including population, land transformation, access and electrical power infrastructure.                                                                            | 1 km       |
| Anthropogenic biomes          | Ellis and Ramankutty   | 2008 | Evaluating the pressure of human activities using population, land use and land cover data and re-identifying the terrestrial biomes.                                                                                                                                                         | ~10 km     |
| Human modification            | Kennedy et al          | 2018 | Using five categories of human stressors, including human settlement, agriculture, mining and energy production, transportation and electrical infrastructure, and the “fuzzy algebraic sum” method to calculate the cumulative degree of human modification across global terrestrial lands. | 1 km       |
| Low-impact areas              | Jacobson et al         | 2019 | Evaluating and mapping the pressure of human activities by combining human population, livestock density, forest change, land cover and nighttime light data in a categorical process and then creating a new categorical map of global human influences.                                     | 1 km       |
| Temporal human pressure index | Geldmann et. al.       | 2019 | Evaluating and mapping the pressure of human activities using three categories of spatial data, including population density, the density of night-visible infrastructure, and the percentage of area covered by cropland.                                                                    | 10 km      |

**Table S2.** Influence scores for roads

| Type       | Distance (km) |         |         |         |         |         |
|------------|---------------|---------|---------|---------|---------|---------|
|            | 0–0.5         | 0.5–1.5 | 1.5–2.5 | 2.5–3.5 | 3.5–4.5 | 4.5–5.5 |
| Expressway | 10            | 8       | 6       | 4       | 2       | 1       |
| National   | 10            | 8       | 5       | 3       | 1       | 0       |
| Provincial | 9             | 6       | 3       | 2       | 1       | 0       |
| County     | 8             | 5       | 3       | 1       | 0       | 0       |
| Others     | 8             | 4       | 1       | 0       | 0       | 0       |

**Table S3.** Mean value and changes of HF in different areas of the QLM

|           | Mean values |       |       |       | Changes   |           |           |           |
|-----------|-------------|-------|-------|-------|-----------|-----------|-----------|-----------|
|           | 2000        | 2005  | 2010  | 2015  | 2000–2015 | 2000–2005 | 2005–2010 | 2010–2015 |
| QLM       | 6.59        | 6.81  | 6.95  | 7.21  | 0.62      | 0.22      | 0.14      | 0.26      |
| Gansu     | 3.57        | 3.74  | 3.79  | 3.93  | 0.36      | 0.17      | 0.05      | 0.14      |
| Qinghai   | 7.92        | 8.17  | 8.35  | 8.66  | 0.74      | 0.24      | 0.18      | 0.32      |
| NR        | 4.77        | 4.97  | 5.05  | 5.22  | 0.45      | 0.20      | 0.08      | 0.17      |
| Forest    | 10.74       | 10.96 | 11.00 | 11.23 | 0.49      | 0.23      | 0.04      | 0.23      |
| Shrubland | 11.19       | 11.28 | 11.31 | 11.60 | 0.41      | 0.09      | 0.03      | 0.29      |
| Grassland | 9.29        | 9.62  | 9.80  | 10.09 | 0.79      | 0.32      | 0.18      | 0.28      |
| Wetland   | 7.04        | 7.33  | 7.71  | 7.98  | 0.94      | 0.29      | 0.38      | 0.27      |
| Bare land | 2.55        | 2.68  | 2.77  | 3.04  | 0.49      | 0.13      | 0.09      | 0.27      |
| Cropland  | 21.70       | 22.24 | 22.77 | 22.92 | 1.22      | 0.54      | 0.53      | 0.15      |
| Built-up  | 22.33       | 22.73 | 23.39 | 23.49 | 1.15      | 0.40      | 0.65      | 0.10      |

**Table 4.** Slope and significance of average NDVI in different regions during 2000–2015.

|           | QLM      | Gansu    | Qinghai  |
|-----------|----------|----------|----------|
| QLM       | 0.0028** | 0.0028** | 0.0026*  |
| NR        | 0.003**  | 0.0031** | 0.0020** |
| Forest    | 0.0032** | 0.0049** | 0.0021*  |
| Shrubland | 0.0023** | 0.0032** | 0.0020*  |
| Grassland | 0.0031** | 0.0034** | 0.0030*  |
| Wetland   | 0.0014   | 0.0019   | 0.0013   |
| Bare land | 0.0022** | 0.0021** | 0.0023*  |
| Cropland  | 0.0039*  | 0.0056*  | 0.0038*  |
| Built-up  | 0.0032*  | 0.0031*  | 0.0033*  |

\* NDVI change is significant with a  $P$  value  $< 0.05$ ; \*\* NDVI change is significant with a  $P$  value  $< 0.01$ .
